# Supplementary material for: Changes in household purchasing of soft drinks following the UK Soft Drinks Industry Levy by household income and composition: controlled interrupted time series analysis, March 2014 to November 2019
Source: bioRxiv or medRxiv preprint supplement (doi:10.1101/2023.11.27.23299070), 2023-11-28

a) Household income <£20,000/year

b) Household Income £20-50,000/year

c) Household Income >£50,000/year

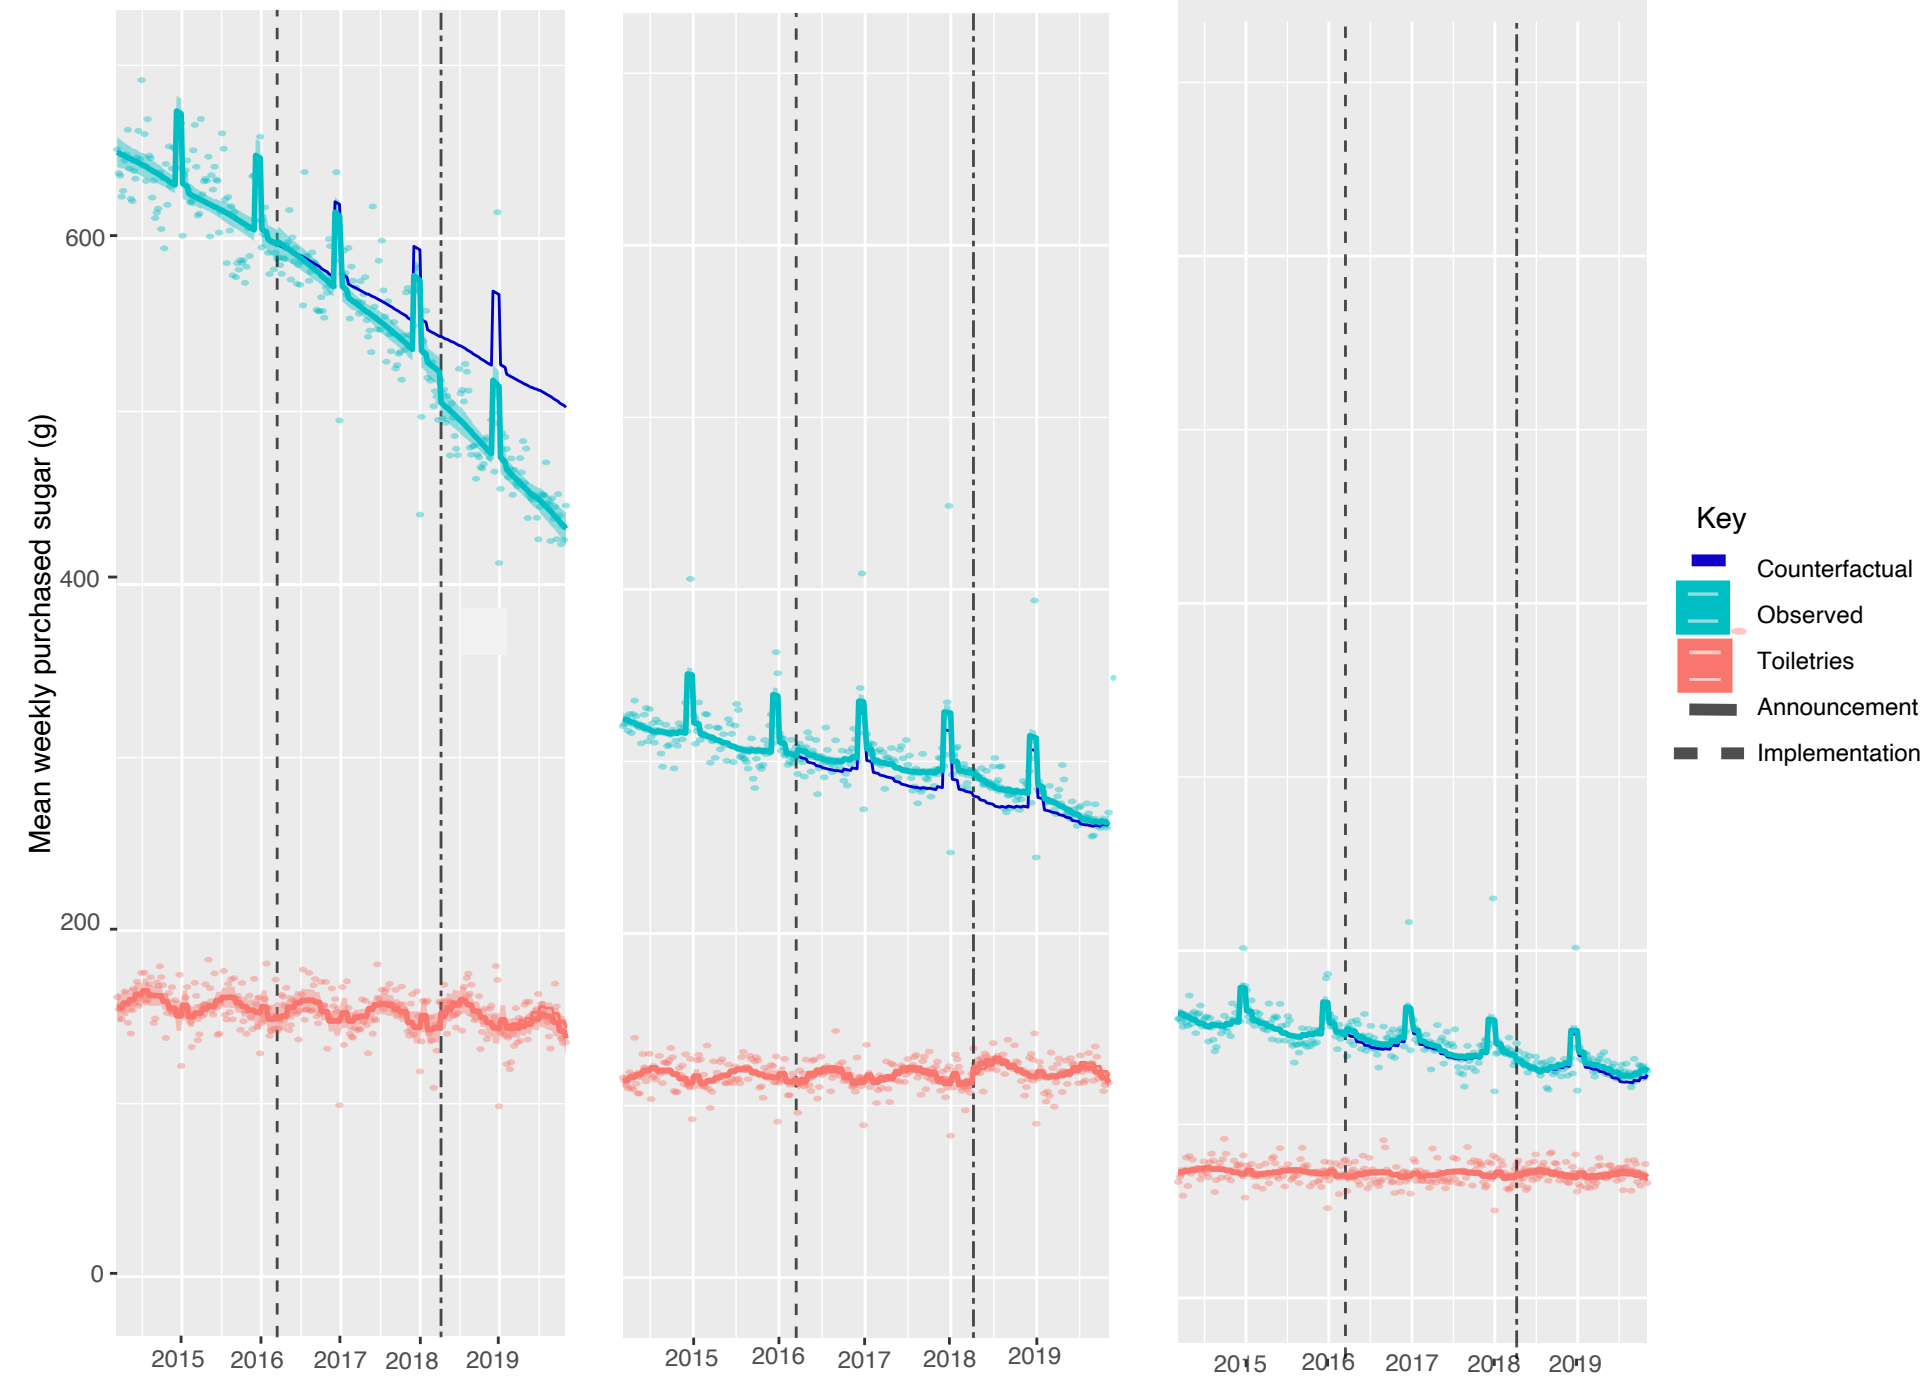

Supplement: Supplementary file [file media-1.pdf]
