# Supplementary material for: Changes in household purchasing of soft drinks following the UK Soft Drinks Industry Levy by household income and composition: controlled interrupted time series analysis, March 2014 to November 2019
Source: bioRxiv or medRxiv preprint supplement (doi:10.1101/2023.11.27.23299070), 2023-11-28
Supplement: Supplementary file [file media-2.pdf]

household income: < £20,000

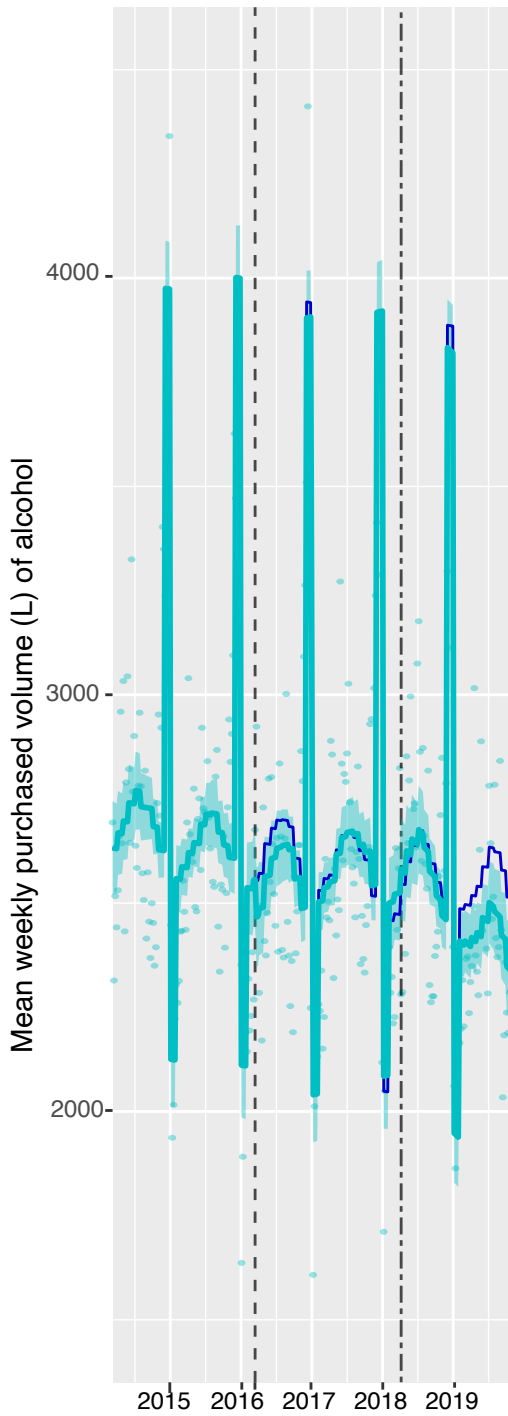

household income: £20,000–£49,999

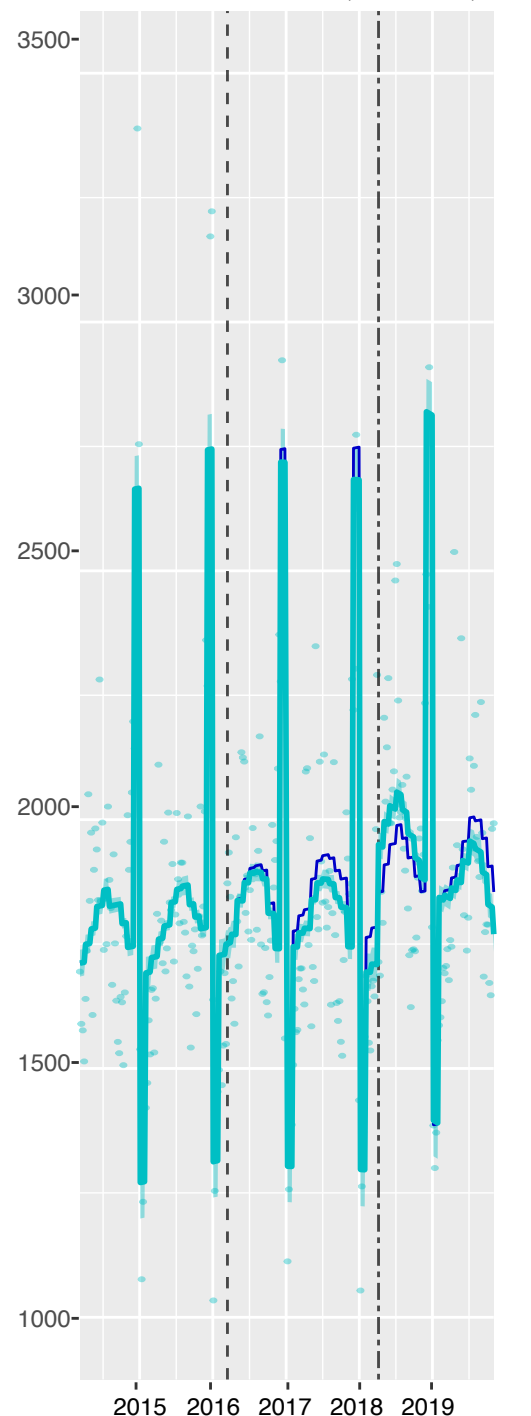

household income: £50,000+

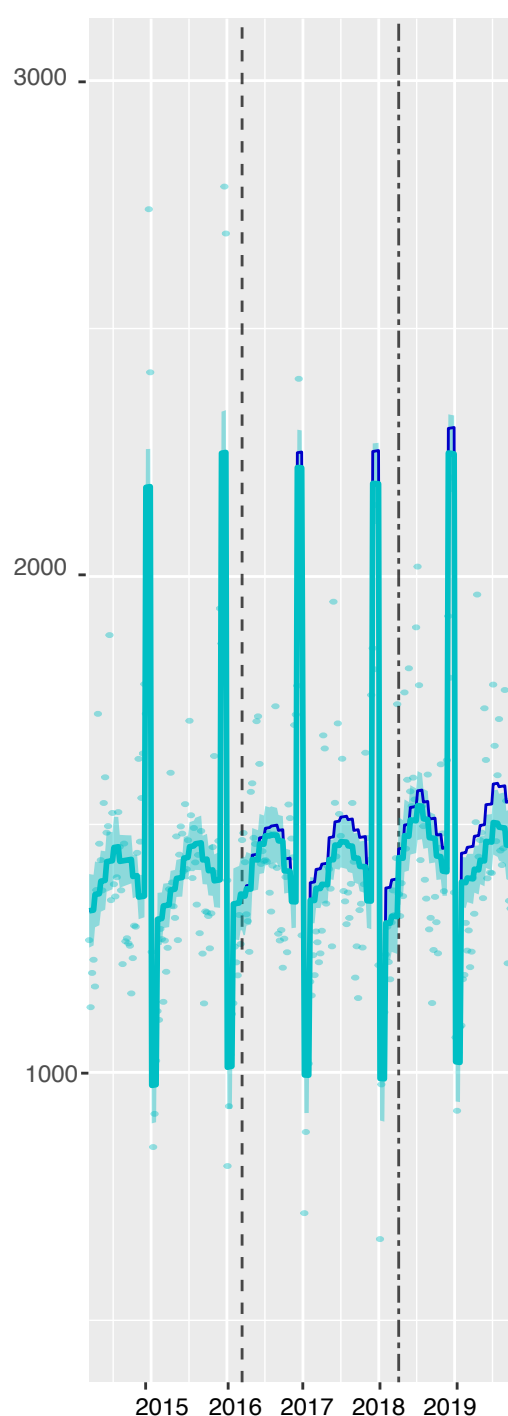

- Key
- Counterfactual
  - Observed
  - Announcement
  - Implementation
